# Supplementary material for: Various Physiological Response to Graphene Oxide and Amine-Functionalized Graphene Oxide in Wheat (Triticum aestivum)
Source: PubMed Central journal article supplement (PMC6100068; doi:10.3390/molecules23051104), 2018-05-07
Supplement: molecules-23-01104-s001.pdf [file molecules-23-01104-s001.pdf]

# Various Physiological Response to Graphene Oxide and Amine-Functionalized Graphene Oxide in Wheat (*Triticum aestivum*)

Juanni Chen, Liang Yang, Shili Li and Wei Ding \*

Laboratory of Natural Product Pesticide, College of Plant protection, Southwest University, Chongqing 400715, China; jemmy@swu.edu.cn (J.C.); ylwzling@163.com (L.Y.); lsl2031st@163.com (S.L.)

\* Correspondence: dingw@swu.edu.cn; Tel.: +86-23-6825-0953; Fax: +86-23-6825-0953

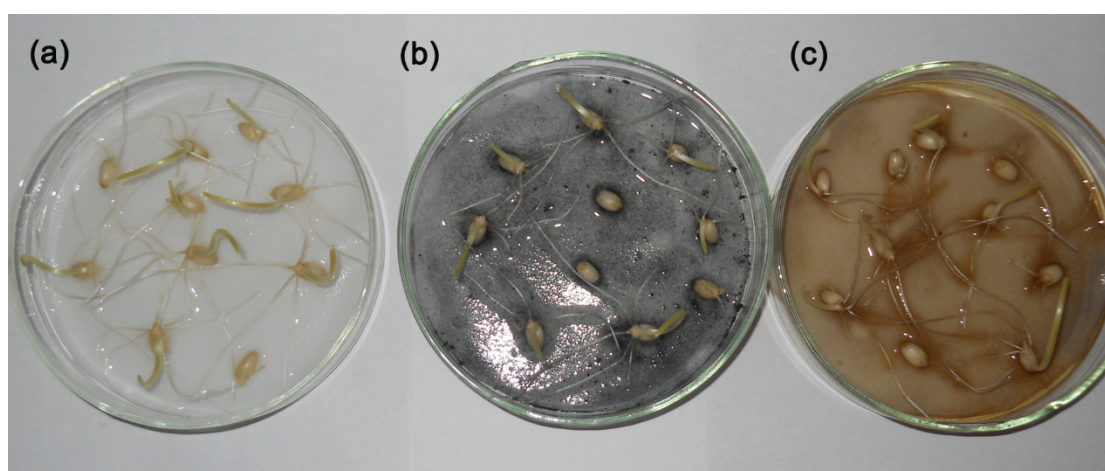

**Figure S1.** Phenotypes of wheat seed germination after incubation with (a) water, 2000 µg/mL of (b) GO and (c) G-NH<sub>2</sub> for 72 h.

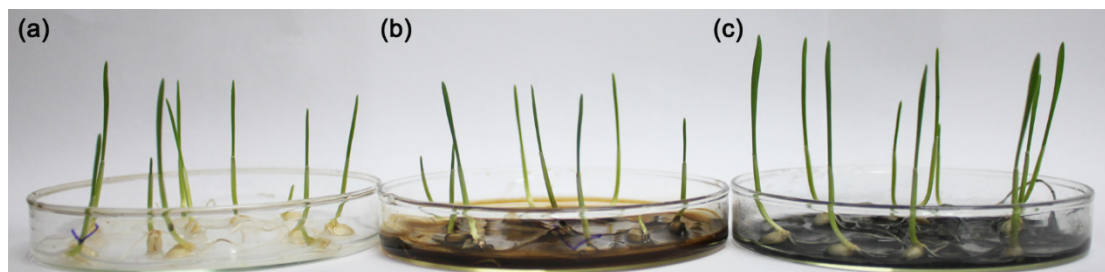

**Figure S2.** Phenotypes of 4-day-old wheat seedlings grown on medium with (a) water, 2000 µg/mL of (b) GO and (c) G-NH<sub>2</sub>.

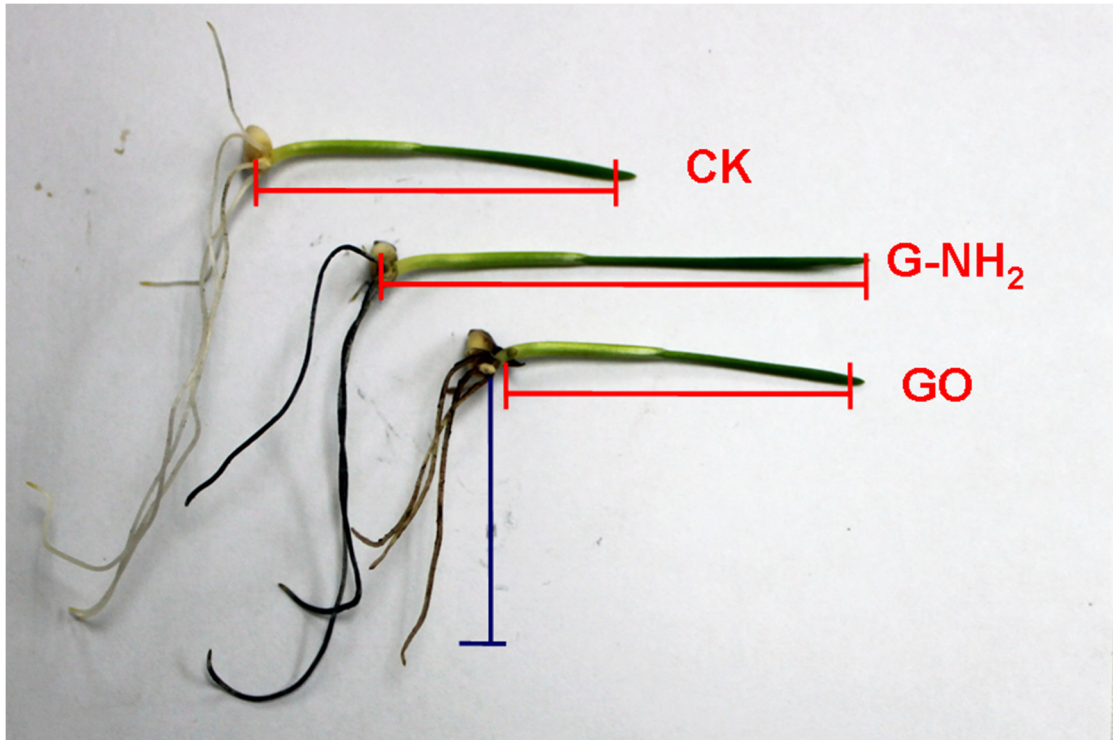

**Figure S3.** Phenotypes of 4-day-old wheat seedlings grown on medium with water (CK), 200  $\mu\text{g/mL}$  of GO and G-NH<sub>2</sub>.
